# Supplementary material
Source: PubMed Central journal article supplement (PMC1798426)
Supplement: bj4020251add.pdf [file bj4020251add.pdf]

## SUPPORTING INFORMATION

**Supplementary Figure 1.** Overlay outlining significant differences in ligand binding between FAH.1 (green) and the previously determined FAH.HMPOBA (cyan) structure (1HYO). Ribbons represent residues 139-148. Nitrogen, oxygen and phosphorus are colored blue, red, and orange respectively. The catalytic  $\text{Ca}^{2+}$  of FAH.HMPOBA and  $\text{Mn}^{2+}$  of FAH.1 are colored green and grey respectively. The water molecule (red) was found only in FAH.HMPOBA. Hydrogen bonding interactions between R142, Y128 and **1** are shown in yellow.

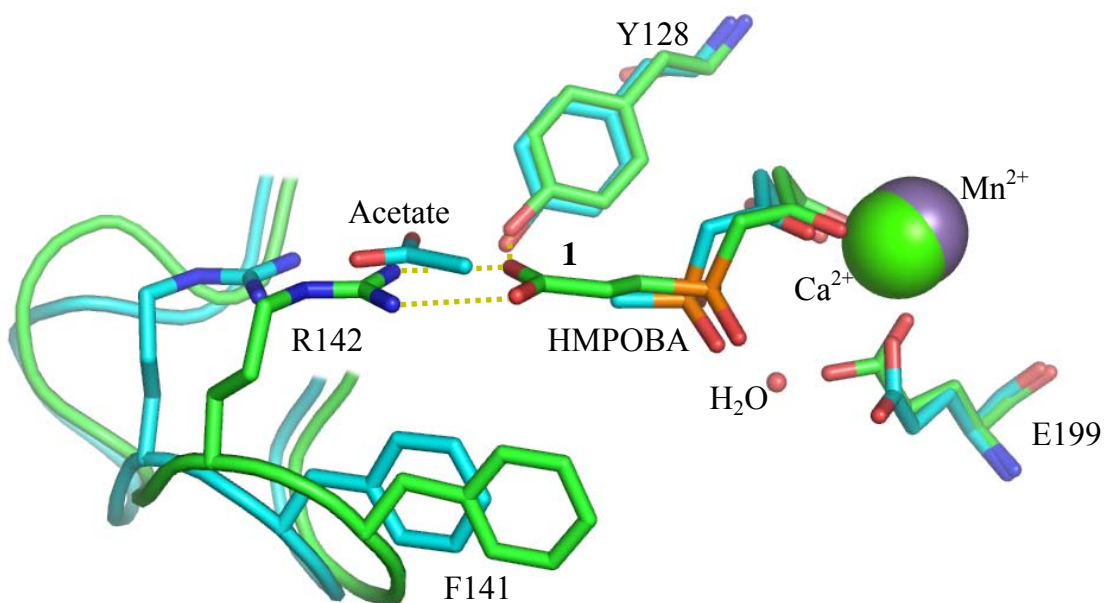

**Supplementary Table 1.** Relative Activity of GST-hFAH during dialysis<sup>1</sup> at 4° C.

|                               | Day 1 | Day 2 | Day 3 | Day 6 | Day 9 | Mn(OAc) <sub>2</sub> <sup>3</sup> |
|-------------------------------|-------|-------|-------|-------|-------|-----------------------------------|
| No metal                      | 1.00  | 0.57  | 0.41  | 0.23  | 0.19  | 0.67                              |
| Chelate cocktail <sup>2</sup> | 1.00  | 0.50  | 0.23  | 0.09  | 0.05  | 1.34                              |
| Ca(OAc) <sub>2</sub>          | 1.00  | 0.64  | 0.35  | 0.16  | 0.11  |                                   |
| Mg(OAc) <sub>2</sub>          | 1.00  | 0.65  | 0.41  | 0.27  | 0.22  |                                   |
| Mn(OAc) <sub>2</sub>          | 1.00  | 0.98  | 0.83  | 0.83  | 0.78  |                                   |

<sup>1</sup>Dialysis solutions contained 1 mM metal acetate in 20 mM Tris pH 7.4, 150 mM NaCl.

<sup>2</sup>Chelate cocktail contained 5 mM EDTA, 5 mM EGTA, 5 mM NTA, 5 mM sodium citrate, 20 mM Tris pH 7.4, and 150 mM NaCl.

<sup>3</sup> Mn(OAc)<sub>2</sub> was added to the dialysis solutions to “rescue” activity: 1 mM in no metal treatment; and 10 mM to the chelate cocktail treated protein sample (the increased amount being necessary to overcome residual chelating agents present in the solution).

*General Methods:*

GST-FAH samples were equilibrated using dialysis tubing with an 8,000 molecular weight cutoff against 500 ml of 20 mM TrisHCl, 0.15 M NaCl, pH 7.4 containing 1 mM divalent cations with stirring for 14 to 16 hours at 4 C. Dialyzed samples were concentrated to approximately 10 mg/mL prior to activity determination.

**Supplementary Table 2.** Ligand H-bond distances from oxygen atoms of **1** to active site residues for individual amino acid chains of the FAH homodimer.

| Residue          |     | Compound <b>1</b> | Chain A (Å) | Chain B (Å) |
|------------------|-----|-------------------|-------------|-------------|
| Arg 142          | NH1 | O4                | 2.78        | 2.83        |
|                  | NH2 | O2                | 2.95        | 2.80        |
| Tyr128           | OH  | O4                | 2.49        | 4.52        |
| Tyr128           | OH  | O2                | 4.74        | 2.60        |
|                  |     |                   |             |             |
| Gln240           | Nε2 | O6                | 2.89        | 2.85        |
| Arg237           | NH1 | O6                | 2.81        | 2.85        |
| Lys253           | Nζ  | O6                | 2.89        | 2.92        |
|                  |     |                   |             |             |
| His133           | Nε2 | O7                | 2.59        | 2.54        |
|                  |     |                   |             |             |
| Tyr159           | OH  | O5                | 3.21        | 3.16        |
| Lys253           | Nζ  | O5                | 2.88        | 2.87        |
| Thr350           | Oγ1 | O1                | 2.90        | 2.86        |
|                  | N   | O3                | 2.91        | 2.87        |
| Mn <sup>2+</sup> |     | O5                | 2.20        | 2.20        |
|                  |     | O1                | 2.09        | 2.11        |
